# Supplementary material for: BSA–tetraphenylethene derivative conjugates with aggregation-induced emission properties: Fluorescent probes for label-free and homogeneous detection of protease and α1-antitrypsin
Source: Royal Society of Chemistry journal article supplement (doi:10.1039/c0an00813c), 2011-01-01
Supplement: c0an00813c.pdf [file c0an00813c.pdf]

## Electronic Supplementary Information

### BSA-Tetraphenylethene Derivative Conjugates with Aggregation-Induced Emission Properties: Fluorescent Probes for Label-free and Homogeneous Detection of Protease and $\alpha$ 1-antitrypsin

*Jian-Ping Xu, Yuan Fang, Zhe-Gang Song, Ju Mei, Lan Jia, An Jun Qin, Jing Zhi Sun, Jian Ji\*, Ben Zhong Tang*

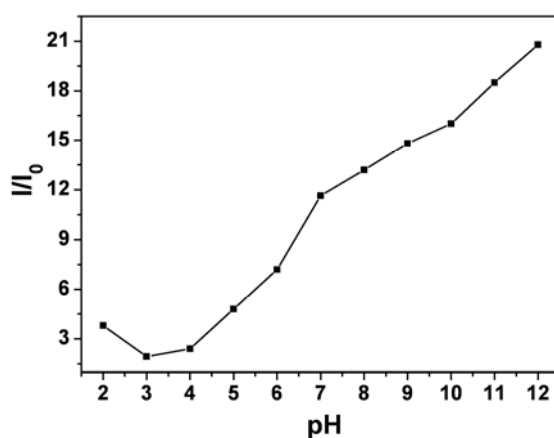

**Fig S1** The effect of pH on the fluorescence enhancement of AIE probe and BSA.

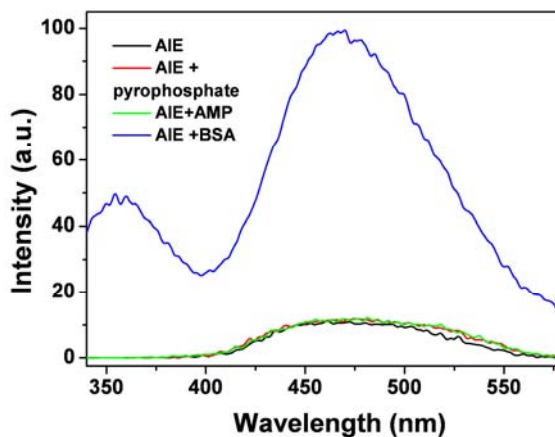

**Fig S2** The influence of adenosine-5'-phosphoric acid (AMP) and pyrophosphate on the fluorescence quenching efficiency
